# Supplementary material for: Enhancing cold tolerance in tobacco through endophytic symbiosis with Piriformospora indica
Source: Frontiers journal article supplement (doi:10.3389/fpls.2024.1459882), 2024-10-25
Supplement: Table_1.XLS [file Table_1.XLS]

## Sheet: Supplementary Table S10
Supplementary Table. Primers used for qRT-PCR.
Primer Name	Forward primer	Reverse primer
NtActin	TCACAGAAGCTCCTCCTAATCCA	GAGGGAAAGAACAGCCTGAATG
NtAMT1.1	GATCCACTTGAAGCAGCACA	TGTGCCCCAAGTAGTTTTCC
NtAMT1.2	CCATCTTTTGACTACAGCTACT	CGTCACCGGACCAGAACCAA
NtAMT1.3	CATAGCTGAACGTACCCAAT	CCACTGCCAGCAAAGTCAAT
NtAMT2.1	GCTTTTGTTCCTCTTTGGCT	GGTGGAAACCTTTCCCTATCA
NtCBF1	GGATGAGGAGACGCTATTCTG	TGTGAACACTGAGGTGGAGG
NtCBF3	TATTCAGAAGGCGACCGT	CCTCCTCGTCCATAAACAA
NtDREB2B	CGGCCGCCCATCTGAGTC	AGGTGGAGGCAGCATTAGTC
NtERD10B	GGCCTTGCAGACGGACGAATAC	TGTTCCGGTGGTTCCATAGTCTCC
NtERD10C	CGGGTGAGGACACGGCTGTA	AGGCGCCACTTCCTCTGTCTTC
NtICE1	TGATAGGCTTTACATGCTGAGATC	AGCTGTTGCAGTTGGCGTTA
NtNRT1.1	GTGGTTTCGTAGCCGACACT	CCGTCATGTATAGTGCTATGT
NtNRT1.2	GGTATCTTTGCCACTGTTCA	CAGCATCGTCGAATTGGTCG
NtNRT2.1	CTATTGGTGCTCAAGCTGCA	CGTGAAGAACAACAGTTGT
NtNRT2.2	GATATTGTGGTATGCTGCAACA	GCCATACCAAATGTGGCAGCA
